# Supplementary material
Source: PubMed Central journal article supplement (PMC4893976)
Supplement: NIHMS749617-supplement-10439_2015_1518_MOESM1_ESM.pdf [file NIHMS749617-supplement-10439_2015_1518_MOESM1_ESM.pdf]

1

2 **SUPPLEMENTAL METHODS**

3 Our supplement details pertinent methods used for geometry reconstruction from optical  
 4 coherence tomography (OCT). In our description of reconstruction methods, we first describe  
 5 the automated method of OCT frame analysis that uses image processing to detect and classify  
 6 strut and lumen-vessel wall boundaries. Method validation is also provided.

7 **OCT FRAME ANALYSIS**8 *METHOD DEVELOPMENT*

9 Fourier-domain OCT acquires scans at multiple depths (termed axial-line scans; A-lines)  
 10 from an imaging wire that rotates inside a fluid-filled polymer tube(1). With one revolution (i.e.  
 11 360°), a complete cross-sectional frame can be acquired. At a pullback speed of 20mm/sec, up  
 12 to 271 of these frames along the vessel length were acquired with distance of 50mm separating  
 13 each segment length-wise. While stent struts and vessel borders are visualized on such OCT  
 14 frames, the proprietary software accompanying the OCT system (LightLab Imaging Inc.,  
 15 Westford, Massachusetts) does not allow for the automated detection that was critical for our  
 16 high processing needs. We therefore developed a method that automatically detects and  
 17 classifies strut position and lumen borders from OCT frames. We did this by **classification** of  
 18 features from A-line scans followed by **edge detection** of the signal within the A-line.

19  
 20 **Classification:** A-lines were classified as belonging to strut or lumen using features  
 21 extracted from the “scale-space signature” of the signal. This signature was generated by  
 22 convolving the 1-D A-line signal,  $f(r)$  where  $r$  is the axial distance, by a mother wavelet  $\psi(r)$

$$23 \quad Wf(s, r) = \frac{1}{s} \int f(r) \psi\left(\frac{r-a}{s}\right) dx. (1)$$

24 Here  $a$  and  $s$  are the shift and scale parameters, respectively. The scale space signature of  
 25 the A-line signal is the local maximum of the wavelet transform with the Laplacian-of-Gaussian  
 26 (LoG) wavelet at each scale  $s = \{0:2^{0.1}:2^8\}$ , referred as the “LoG response”. Tsantis et al.(2)  
 27 have demonstrated that the LoG response of metallic struts are characteristically different to  
 28 that of tissues (Supplement Figure 1B). We similarly extracted features from the LoG response  
 29 (Supplemental Table 1) and used these features to train a machine learning model based on a  
 30 decision tree algorithm (Bootstrap aggregation) to classify the A-line signal into three groups: (1)  
 31 strut and (2) lumen and (3) “other” structures (residual blood).

32 Table 1: Table of Extracted Features used to classify lumen and stent strut structures in OCT  
 33 images

| Features Derived from Wavelet Transform |                                            |
|-----------------------------------------|--------------------------------------------|
| Scale                                   | $s=s^*$ , location of maximum Log Response |
| Maximum LoG Response                    | $\max : ! ;$                               |

|                                                                  |
|------------------------------------------------------------------|
| Position on radial axis of maximum LoG Response at scale $s=s^*$ |
| Standard deviation of LoG Response                               |
| Mean LoG Response                                                |
| Skew of LoG Response                                             |
| Position on radial axis of maximum DoG Response at scale $s=s^*$ |
| <b>Signal Features</b>                                           |
| Max(signal)                                                      |
| Mean (signal)                                                    |
| <b>Neighbourhood Features</b>                                    |
| $s^*$ of four closest neighbours                                 |

1 As the guidewire is metallic and has a similar scale space signature as “struts”, a semi-  
2 automated approach was used to avoid misclassification errors. Briefly, the guidewire was  
3 selected manually on the first frame, and then a minimum spanning tree algorithm automatically  
4 identified the guidewire on each subsequent slice along the pullback length. Entities initially  
5 classified as “struts” but characterized as “guidewire” based on this algorithm were reclassified  
6 as “other”.

7 **Edge detection:** Once A-lines had been classified, edge locations of the strut and lumen  
8 were obtained using another wavelet transformation (akin to a Canny edge detector(3)). Edges  
9 of the strut (abluminal side) and lumen/tissue interface represent a step edge. To optimally  
10 detect these edges, the A-line signal was convolved with the normalized first derivative of the  
11 Gaussian wavelet. This wavelet has a characteristic scale  $s^*$  taken from the LoG response for  
12 either strut or lumen classification noted above. A-lines classified as “other” were not  
13 considered. Adjacent strut pixels in the polar image were clustered using connected  
14 components labeling(4), and each cluster’s centroid was used to define a single pixel defining  
15 abluminal strut surface position (as designated by the red cross in Supplemental Figure 1C). .  
16 Lumen pixel candidates were interpolated and smoothed to generate a closed lumen border (as  
17 designated by the green boundary in Supplemental Figure 1C). Strut surface pixels and lumen  
18 border pixels were transformed into Cartesian coordinates. The true centroid of the 2D strut was  
19 obtained by projecting the strut surface position by half a strut width in the direction of the vessel  
20 wall.

## 21 *VALIDATION*

22 Accuracy of extracted strut and lumen dimensions was computed using a candidate data set  
23 in the LCX vessel of a single pig. Each A-line within the stented segment of 80 slices ( $\approx 40100$   
24 A-line signals) was classified as belonging to strut, lumen or “other” categories (including  
25 contrast or artifacts in the tissue). A classifier was trained with these categories as outputs and  
26 the extracted features of the A-line signal from the wavelet transform as the inputs. Receiver-  
27 operator characteristic curves showed an area under the curve (AUC) measurement for  
28 classification of strut candidates to be 0.99, the lumen  $\sim 1.0$  and for “other” structures 0.99, with

1 sensitivity and specificity values ranging from approximately 0.94-1.0 and 0.83-0.99,  
2 respectively (Supplemental Figure 1C). This method of feature detection had a 10-fold cross-  
3 validation rate of 99.8% in successfully predicting strut classes, and a 99.2% and 97.8% rate for  
4 lumen and “other” structures, respectively.

5 As a secondary confirmation, comparisons were made in area measurements with the  
6 proprietary software (LightLab Imaging Inc., Westford, Massachusetts). Manual tracings of stent  
7 and lumen were made by a trained operator in three stented vessels in a different animal than  
8 that was used to train the automated classifier. Lumen area was calculated as the integrand of  
9 the radial location of the lumen boundaries in the Cartesian image while the stent area was  
10 calculated from a circle fitted to the detected stent struts within each frame (frames with less  
11 than one detected strut per quadrant were discarded). Differences in area measurements  
12 between the manual and automated methods are presented in the text as mean  $\pm$  standard  
13 deviation, along with linear regression analysis and their respective Pearson correlation  
14 coefficients.

15

1 SUPPLEMENTAL FIGURES

2

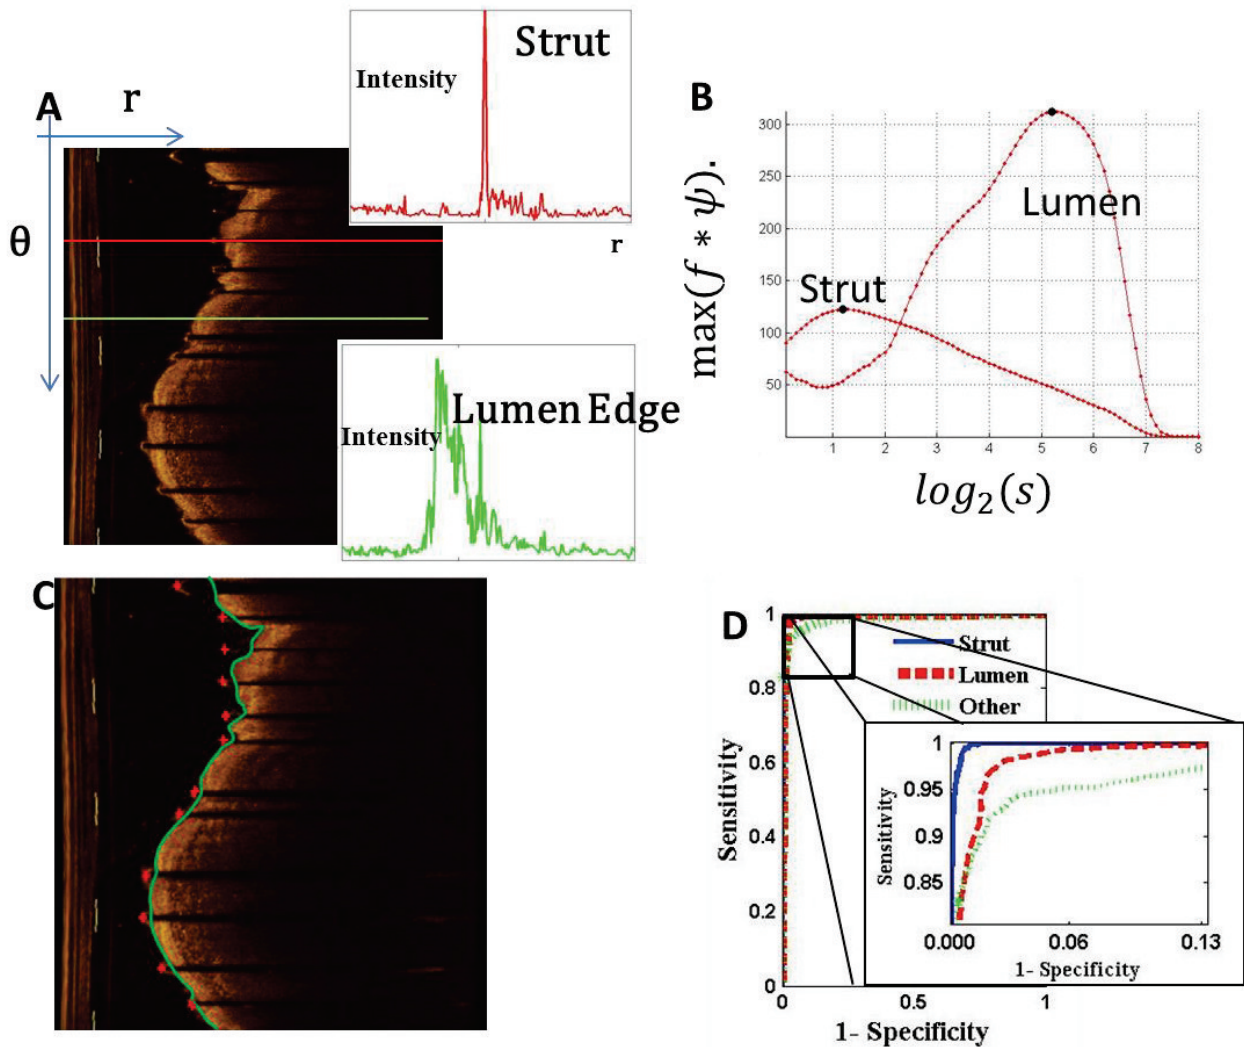

3

4 Supplemental Figure 1: (A) Example of an optical coherence image in the polar coordinate  
 5 system. A pixel stent strut candidate creates a trailing shadow in its A-line, when compared to a  
 6 pixel candidate belonging to the lumen wall. (B) The convolution of each A-line signal with the  
 7 negative normalized second-derivative of the Gaussian yields the LoG response across scales,  
 8 and this coarse-to-fine tracking is called the scale space signature. Using features extracted  
 9 from the scale space signature, one can classify structures as part of either (C) lumen (-) or stent  
 10 strut (+). (D) Receiver operator characteristic curves illustrate the accuracy in classifying lumen  
 11 and strut structures from the derived feature set and using a decision tree algorithm (Bootstrap  
 12 aggregation).

13

1

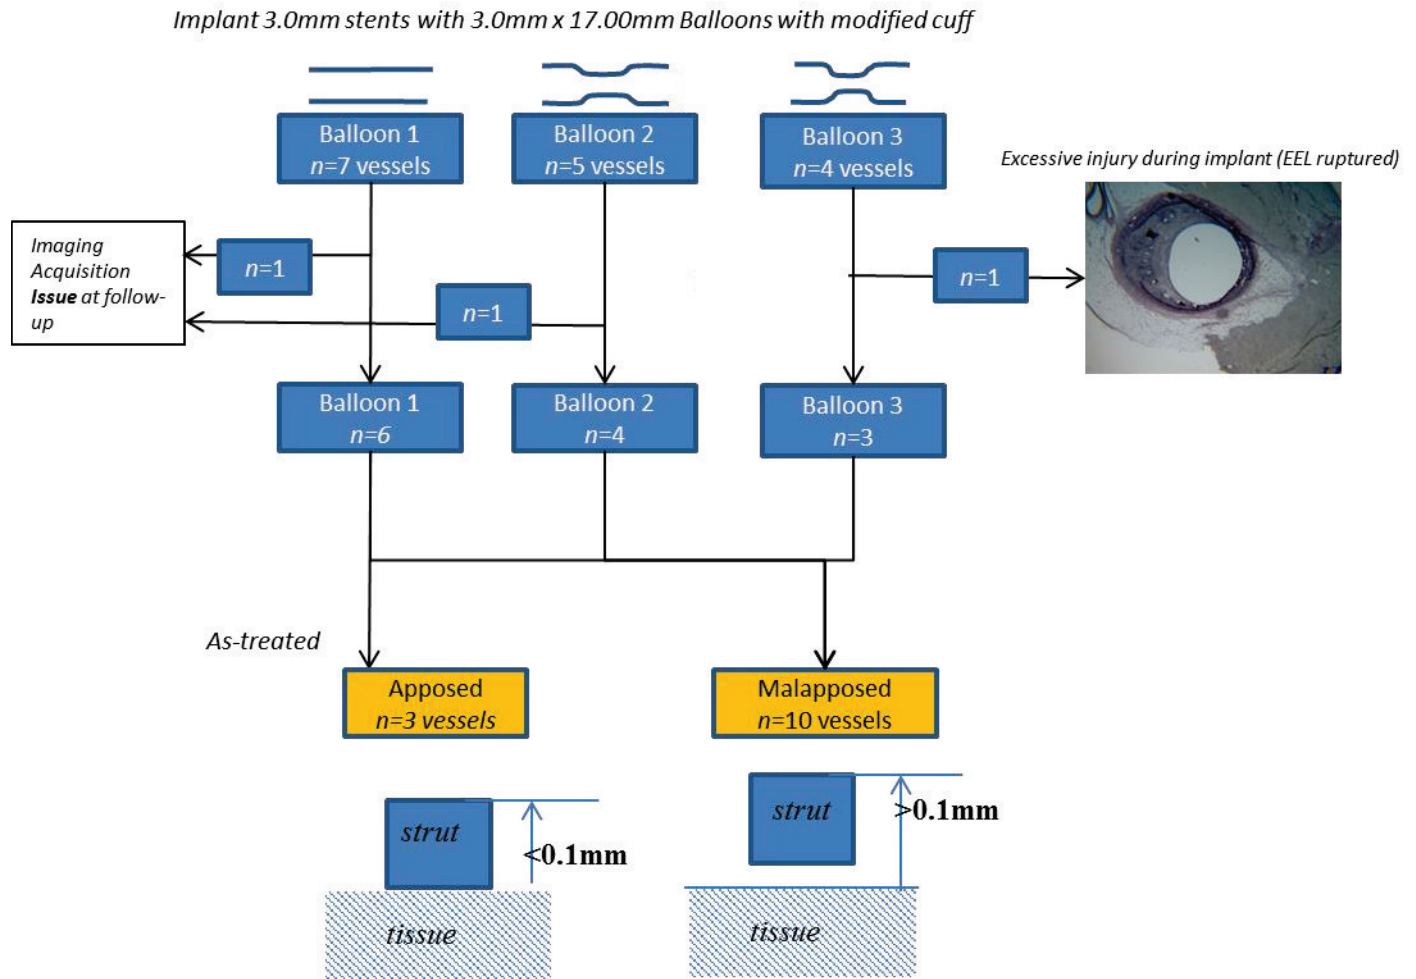

2

3

4 Supplemental Figure 2: Study Design

5

6

7

8

9

# SUPPLEMENTAL REFERENCES

1  
2  
3  
4  
5  
6  
7  
8  
9  
10  
11  
12  
13

1. Bezerra H. G., M. A. Costa, G. Guagliumi, A. M. Rollins, D. I. Simon. Intracoronary optical coherence tomography: a comprehensive review clinical and research applications. *JACC Cardiovasc Interv* 2009;2:1035-46.
2. Tsantis S., G. C. Kagadis, K. Katsanos, D. Karnabatidis, G. Bourantas, G. C. Nikiforidis. Automatic vessel lumen segmentation and stent strut detection in intravascular optical coherence tomography. *Med. Phys.* 2012;39:503-13.
3. Zhang L., P. Bao. Edge detection by scale multiplication in wavelet domain. *Pattern Recognition Letters* 2002;23:1771-1784.
4. Haralick R. M., L. G. Shapiro. *Computer and Robot Vision*: Addison-Wesley Longman Publishing Co., Inc., 1992.
